# Supplementary material for: In Silico and In Vitro Study of Isoquercitrin against Kidney Cancer and Inflammation by Triggering Potential Gene Targets
Source: MDPI journal article supplement (doi:10.3390/cimb46040208), 2024-04-12
Supplement: s1 [file s1]

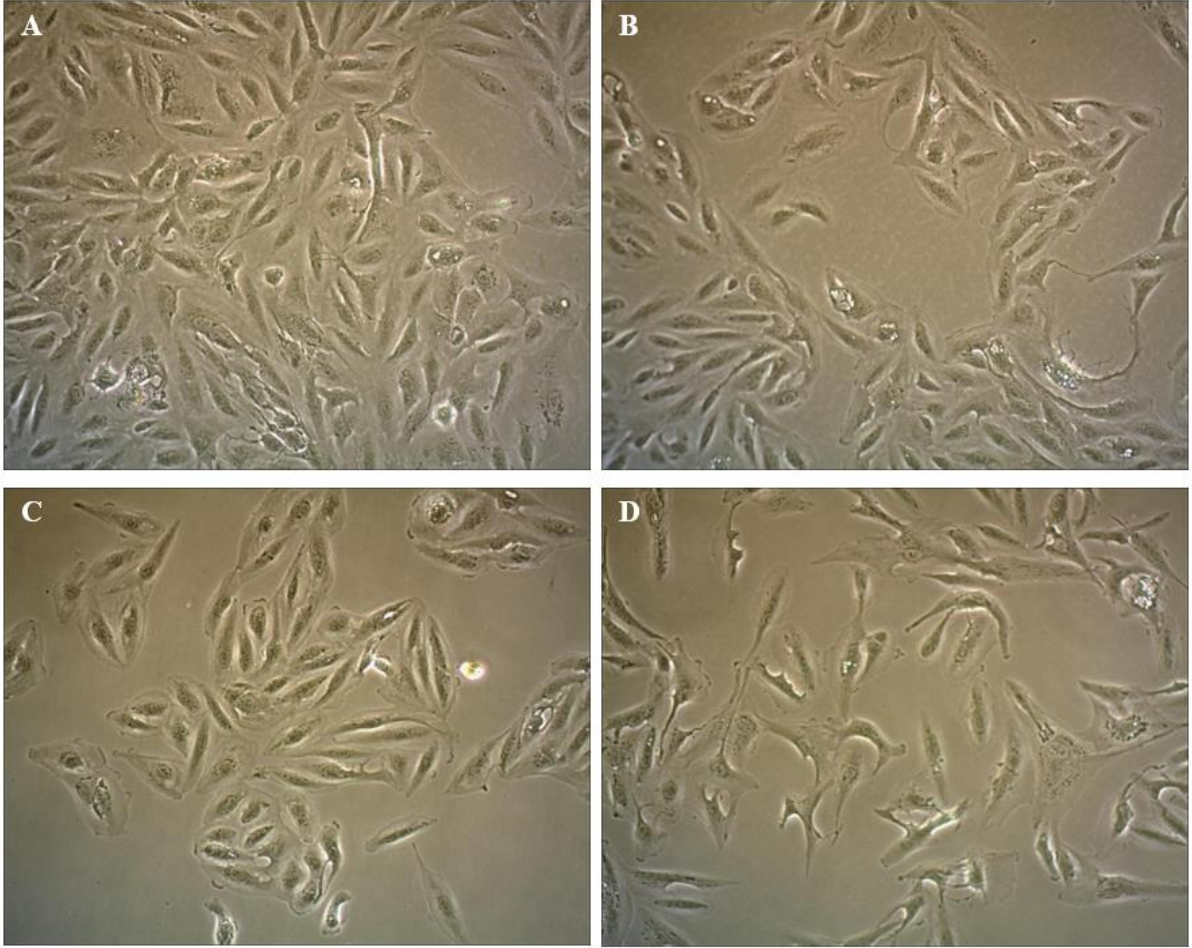

**Figure S1:** Effect of different compounds on A498 kidney cancer cell line. A. Before treatment (cultured for 24 hours), B. After treatment with cisplatin (10  $\mu\text{g/ml}$ - 24 hours), C-D. After treatment with IQ (two doses 5  $\mu\text{g/ml}$ , and 10  $\mu\text{g/ml}$  respectively – 24 hours).
