# Supplementary material for: In Silico and In Vitro Study of Isoquercitrin against Kidney Cancer and Inflammation by Triggering Potential Gene Targets
Source: Curr Issues Mol Biol. 2024 Apr 12;46(4):3328–41. doi: 10.3390/cimb46040208 (PMC11049307; doi:10.3390/cimb46040208)
Supplement: Supplementary file 1 [file cimb-46-00208-s001.zip]

Archive with 5 entries (5 files):
- Figure S1.pdf
- Supplementary 1.pdf
- Supplementary 2.pdf
- Supplementary 3.pdf
- Supplementary 4.pdf
